# Supplementary material
Source: publisher figshare collection journal article supplement (https://springernature.figshare.com/articles/dataset/_/7587812)

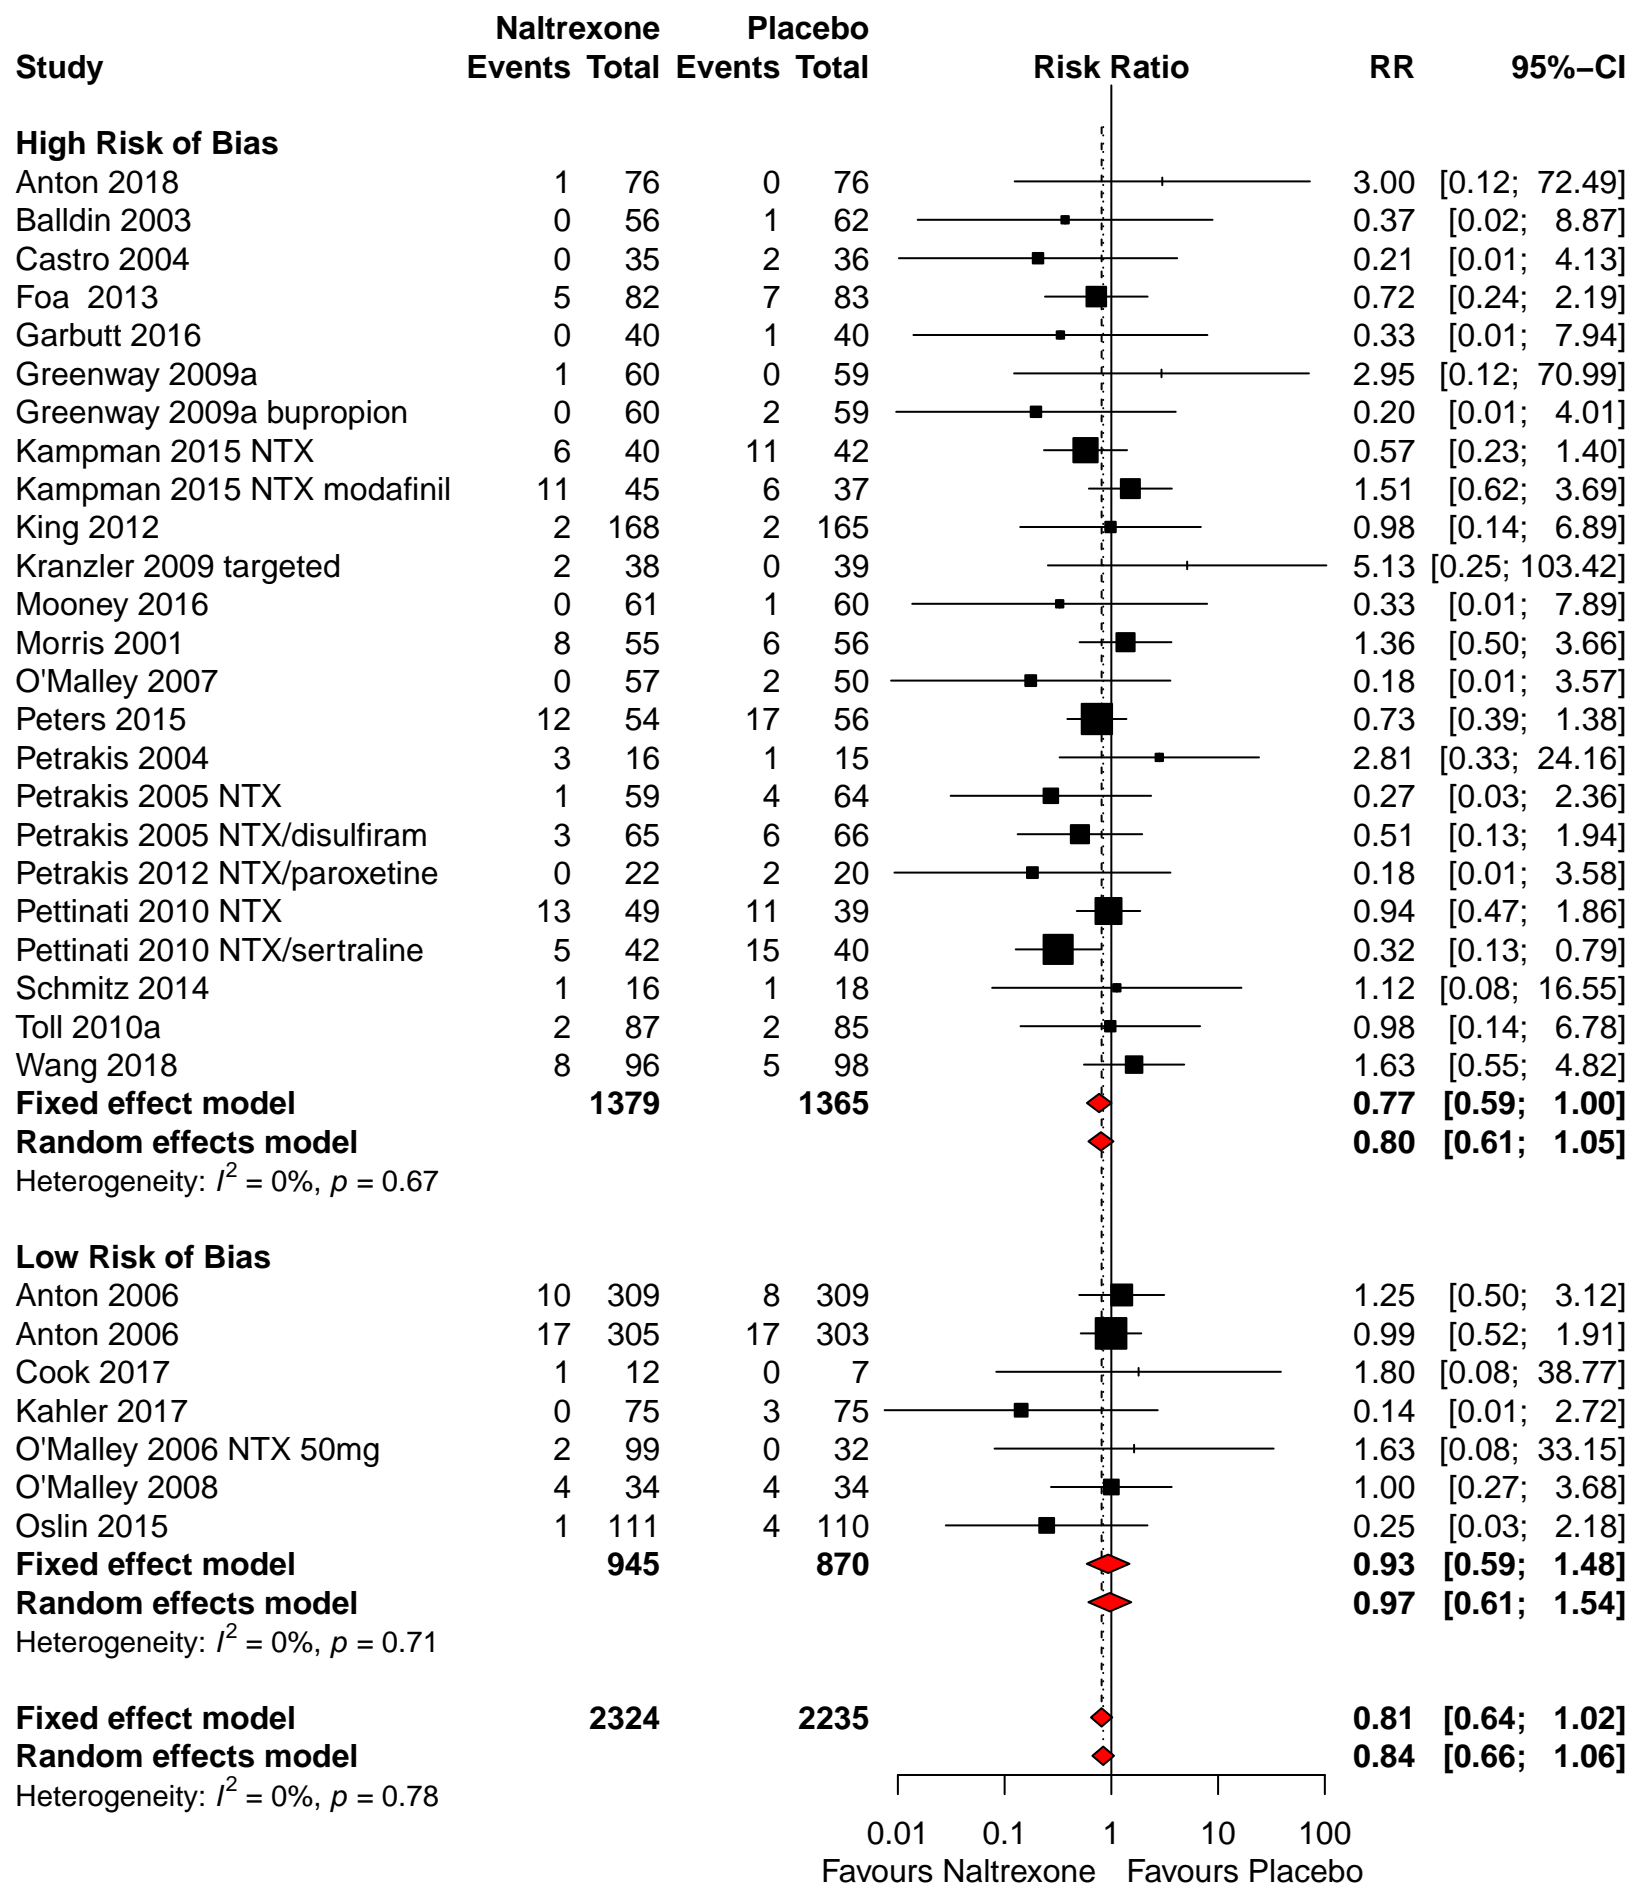

Supplement: Supplementary file [file 14089100]
